# Supplementary material for: Use of a whole genome sequencing-based approach for Mycobacterium tuberculosis surveillance in Europe in 2017–2019: an ECDC pilot study
Source: PubMed Central journal article supplement — Eur Respir J. 2021 Jan 5;57(1):2002272. doi: 10.1183/13993003.02272-2020 (PMC7784142; doi:10.1183/13993003.02272-2020), 2021-01-05
Supplement: ERJ-02272-2020.Shareable.pdf [file ERJ-02272-2020.Shareable.pdf]

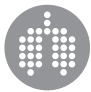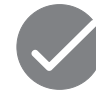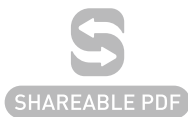

# Use of a whole genome sequencing-based approach for *Mycobacterium tuberculosis* surveillance in Europe in 2017–2019: an ECDC pilot study

Elisa Tagliani <sup>1</sup>, Richard Anthony<sup>2,11</sup>, Thomas A. Kohl <sup>3,4,11</sup>, Albert de Neeling<sup>2</sup>, Vlad Nikolayevskyy <sup>5,6</sup>, Csaba Ködmön<sup>7</sup>, Florian P. Maurer <sup>8,9</sup>, Stefan Niemann<sup>3,4</sup>, Dick van Soolingen<sup>2</sup>, Marieke J. van der Werf <sup>7</sup> and Daniela Maria Cirillo <sup>1</sup> on behalf of the ECDC molecular surveillance project participants<sup>10</sup>

**Affiliations:** <sup>1</sup>Emerging Bacterial Pathogens Unit, Division of Immunology, Transplantation and Infectious Diseases, IRCCS San Raffaele Scientific Institute, Milan, Italy. <sup>2</sup>Tuberculosis Reference Laboratory, Infectious Diseases Research, Diagnostics and Laboratory Surveillance (IDS), National Institute for Public Health and the Environment (RIVM), Bilthoven, The Netherlands. <sup>3</sup>Molecular and Experimental Mycobacteriology, National Reference Center for Mycobacteria, Research Center, Borstel, Germany. <sup>4</sup>German Center for Infection Research, partner site Borstel-Hamburg-Lübeck-Riems, Borstel, Germany. <sup>5</sup>Public Health England, London, UK. <sup>6</sup>Imperial College London, London, UK. <sup>7</sup>European Centre for Disease Prevention and Control, Stockholm, Sweden. <sup>8</sup>Diagnostic Mycobacteriology, National Reference Center for Mycobacteria, Borstel, Germany. <sup>9</sup>Institute of Medical Microbiology, Virology and Hygiene, University Medical Center Hamburg-Eppendorf, Hamburg, Germany. <sup>10</sup>See Acknowledgements for full details. <sup>11</sup>Both authors contributed equally.

**Correspondence:** Elisa Tagliani, Emerging Bacterial Pathogens Unit, Division of Immunology, Transplantation and Infectious Diseases, IRCCS San Raffaele Scientific Institute, Via Olgettina 58, 20132 Milan, Italy. E-mail: tagliani.elisa@hsr.it

@ERSpublications

The implementation of a WGS-based surveillance system for monitoring the emergence of MDR-TB outbreaks in Europe is feasible and has the potential to provide supporting evidence to better elucidate cross-border transmission patterns <https://bit.ly/2ZTnPjk>

**Cite this article as:** Tagliani E, Anthony R, Kohl TA, *et al.* Use of a whole genome sequencing-based approach for *Mycobacterium tuberculosis* surveillance in Europe in 2017–2019: an ECDC pilot study. *Eur Respir J* 2021; 57: 2002272 [<https://doi.org/10.1183/13993003.02272-2020>].

This single-page version can be shared freely online.

**ABSTRACT** Whole genome sequencing (WGS) can be used for molecular typing and characterisation of *Mycobacterium tuberculosis* complex (MTBC) strains. We evaluated the systematic use of a WGS-based approach for MTBC surveillance involving all European Union/European Economic Area (EU/EEA) countries and highlight the challenges and lessons learnt to be considered for the future development of a WGS-based surveillance system.

WGS and epidemiological data of patients with rifampicin-resistant (RR) and multidrug-resistant (MDR) tuberculosis (TB) were collected from EU/EEA countries between January 2017 and December 2019. WGS-based genetic relatedness analysis was performed using a standardised approach including both core genome multilocus sequence typing (cgMLST) and single nucleotide polymorphism (SNP)-based calculation of distances on all WGS data that fulfilled minimum quality criteria to ensure data comparability.

A total of 2218 RR/MDR-MTBC isolates were collected from 25 countries. Among these, 56 cross-border clusters with increased likelihood of recent transmission ( $\leq 5$  SNPs distance) comprising 316 RR/MDR-MTBC isolates were identified. The cross-border clusters included between two and 30 resistant isolates from two to six countries, demonstrating different RR/MDR-TB transmission patterns in Western and Eastern EU countries.

This pilot study shows that a WGS-based surveillance system is not only feasible but can efficiently elucidate the dynamics of in-country and cross-border RR/MDR-TB transmission across EU/EEA countries. Lessons learnt from this study highlight that the establishment of an EU/EEA centralised WGS-based surveillance system for TB will require strengthening of national integrated systems performing prospective WGS surveillance and the development of clear procedures to facilitate international collaboration for the investigation of cross-border clusters.
