# Supplementary material for: Use of a whole genome sequencing-based approach for Mycobacterium tuberculosis surveillance in Europe in 2017–2019: an ECDC pilot study
Source: PubMed Central journal article supplement — Eur Respir J. 2021 Jan 5;57(1):2002272. doi: 10.1183/13993003.02272-2020 (PMC7784142; doi:10.1183/13993003.02272-2020), 2021-01-05
Supplement: ERJ-02272-2020_Supplementary_material.pdf [file ERJ-02272-2020_Supplementary_material.pdf]

## 1 **Supplementary Notes**

### 2 **Supplementary Note S1**

3 Data collection. WGS and epidemiological data of RR/MDR-TB cases from EU/EEA countries  
4 were collected by the EUSeqMyTB consortium (San Raffaele Scientific Institute (OSR), Milan,  
5 Italy; National Institute for Public Health and the Environment (RIVM), Bilthoven,  
6 Netherlands; National Reference Center for Mycobacteria, Research Center Borstel (RCB),  
7 Germany; and Public Health England (PHE), London United Kingdom).

8 Raw sequencing data (FASTQ files) generated by individual countries using either the  
9 Illumina or Ion Torrent technologies, were shared via secured File transfer protocol (SFTP)  
10 by country study coordinators, processed and included in the EUSeqMyTB database. EU/EEA  
11 countries without access to WGS services sent DNA or heat-inactivated RR/MDR-MTBC  
12 isolates to their appointed EUSeqMyTB consortium laboratory according to the study  
13 standard operating procedures. Countries provided, if available, key clinical/epidemiological  
14 data (i.e. age, sex, country of birth of the TB case, and site of the disease) and laboratory  
15 data associated to each RR/MDR-MTBC isolate (i.e. year of isolation, rifampicin resistance  
16 profile, and sequencing method used). Laboratories followed their national guidelines to  
17 determine the drug resistance profile of the submitted isolates and the sampling method.  
18 Local laboratory codes were pseudo anonymized using a unique European Union Sequencing  
19 Typing (EUST) sample identifier to comply with the EU Regulation 2016/679 on General Data  
20 Protection Regulation (GDPR). The list of identifiers was communicated to the country study  
21 coordinators via SFTP.

22 Data validation. WGS data underwent quality checking and were only included in the study if  
23 fulfilling pre-defined quality criteria. Raw sequence data were mapped to the H37Rv genome  
24 (GenBank ID: NC\_000962.3) and entered into the study database if more than 95% of the  
25 reference genome was covered by sequence reads with sufficient sequence data quantity and  
26 quality for reliable variant detection. A mean read coverage depth of at least 30x was  
27 considered as acceptable. The key pre-analytical, analytical and post-analytical parameters  
28 applied in this study were derived from a technical consultation involving experts from  
29 different fields, i.e. from microbiology to bioinformatic and public health. These are  
30 summarized in Supplementary table 1.

31 Sequencing platform comparison. Out of a total 2,218 isolates submitted to our study, 2,182  
 32 (98.4%) and 36 (1.6%) isolates were sequenced using the Illumina and Ion Torrent technology,  
 33 respectively. Among the Illumina sequencing platforms, a total of 1,896 (86.9%) isolates  
 34 underwent sequencing by NextSeq, 149 (6.8%) by HiSeq, 115 (5.3%) by MiSeq, and 22 (1.0%)  
 35 by MiniSeq. Although a detailed comparison of the sequencing platforms performance  
 36 through the analysis of the error statistics was out of scope of this work, we did compare the  
 37 obtained coverage depth and coverage breadth. Overall, the isolates sequenced by Ion  
 38 Torrent had a slightly lower coverage breadth (97.25% vs 98.70%) and a lower mean coverage  
 39 depth compared to those sequenced by Illumina (Table 1 below). Among the different  
 40 Illumina sequencing platforms, the isolates sequenced by NextSeq and Miniseq platforms  
 41 showed a slightly higher mean coverage depth compared to those sequenced using the HiSeq  
 42 and MiSeq platforms, while the coverage breadth was comparable (Table 1).

43 **Table 1.** Sequencing platforms comparison.

|                                  | Ion Torrent     | Illumina                   |                          |                          |                            |
|----------------------------------|-----------------|----------------------------|--------------------------|--------------------------|----------------------------|
| Mean coverage depth              | N. isolates (%) | NextSeq<br>N. isolates (%) | HiSeq<br>N. isolates (%) | MiSeq<br>N. isolates (%) | MiniSeq<br>N. isolates (%) |
| >50                              | 22 (61.1)       | 1869 (98.6)                | 135 (90.6)               | 101 (87.8)               | 22 (100)                   |
| 30-50                            | 11 (30.6)       | 22 (1.2)                   | 13 (8.7)                 | 13 (11.3)                | 0                          |
| 20-30                            | 3 (8.3)         | 5 (0.2)                    | 1 (0.7)                  | 0                        | 0                          |
| <20                              | 0               | 0                          | 0                        | 1 (0.9)*                 | 0                          |
| <b>Total</b>                     | <b>36</b>       | <b>1896</b>                | <b>149</b>               | <b>115</b>               | <b>22</b>                  |
| <b>Mean coverage breadth (%)</b> | <b>97.25</b>    | <b>98.76</b>               | <b>98.45</b>             | <b>98.23</b>             | <b>98.27</b>               |

44

## 45 **Supplementary Note S2**

46 Methods used for WGS-based relatedness analysis. The cgMLST analysis was performed  
 47 using the commercially available SeqSphere+ version 6.0.0 software (Ridom GmbH,  
 48 Münster, Germany) default setting with a scheme of 2,891 core genome genes [1], using a  
 49 threshold of  $\leq 5$  alleles to identify clusters.

50 The SNP-based approach relied on the use of the MTBseq bioinformatic pipeline [2]. Briefly,  
 51 reads were mapped to the H37Rv genome (GenBank ID: NC\_000962.3) with BWA [3].

52 Alignments were then refined with the GATK [4] and Samtools [5] toolkits for base quality  
 53 recalibration and alignment corrections for possible PCR and InDel artefact. Variants (SNPs  
 54 and InDels) were called if the following criteria were met: a minimum coverage of four reads

55 in both forward and reverse orientation, four reads calling the allele with at least a phred  
56 score of 20, and an allele frequency of 75%.

57 The SNP-based analysis was performed on the pool of MTBC isolates clustering by cgMLST,  
58 using a maximum distance threshold  $\leq 5$  SNPs. Briefly, regions annotated as repetitive  
59 elements, InDels, multiple consecutive SNPs in a 12-bp window, and 92 genes implicated in  
60 antibiotic resistance are excluded for the phylogenetic reconstruction. In the combined  
61 analysis, all genome positions that fulfil the aforementioned criteria for coverage and  
62 variant frequency in 95% of all samples in the datasets are considered as valid [6]. From the  
63 concatenated sequence alignments, isolates are grouped by agglomerative clustering with a  
64 maximum distance threshold  $\leq 5$  SNPs to the nearest isolate in the same group.

65 WGS-based drug resistance prediction. The screening for drug resistance mutations was  
66 performed by switching the MTBseq pipeline [2] into the low frequency detection mode, in  
67 which the non-wild type majority base call is used and thresholds set to at least one read in  
68 both forward and reverse orientation, at least one read calling the allele with a phred score  
69 of at least 20, and 5% allele frequency. Detected variants were annotated with known  
70 resistance association of either the mutation itself or its genomic region according to the  
71 literature [7-9].

### 72 **Supplementary Note S3**

73 Data reporting to study participants. The results of the SNP-based relatedness and drug  
74 resistance analysis were made available to the study participants through a dedicated and  
75 access controlled external webserver (<https://www.euseqmytb.eu/>). For each of the  
76 submitted isolates, the webserver allowed to assess: i) the related isolates within a distance  
77 chosen by the user; ii) the list of resistance related variants; iii) the list of all variants of each  
78 isolate; iv) the comparison of the SNPs of a chosen index isolate to the SNPs in any other  
79 isolate in the database.

80 The Minimum Spanning Trees of the related isolates could also be viewed, where isolates  
81 from different countries were highlighted in different colours. In addition, Minimum  
82 Spanning Networks and UPGMA trees based on groups of isolate chosen by the user could  
83 be generated and easily exported.

### 84 **Supplementary Note S4**

85 RR/MDR-MTBC strains lineage distribution in EU/EEA. A total of 2,151 RR/MDR-MTBC  
86 isolates were included in the study database. The Euro-American lineage represented more  
87 than 50% of the RR/MDR-MTBC strains in Croatia (66.7%), France (58.6%), Hungary (72.7%),  
88 Ireland (60.9%), Italy (63.8%), Norway (50.0%), Portugal (89.2%), Slovakia (75.0%), Spain  
89 (71.2%), and almost the totality of RR/MDR-MTBC strains in Bulgaria (96.9%), Romania  
90 (96.0%), and Slovenia (100%). The Beijing lineage was instead more frequently represented  
91 in Austria (52.0%), Belgium (57.9%), Czech Republic (76.0%), Germany (52.0%), Finland  
92 (66.7%), Lithuania (65.4%), Latvia (50.6%), Poland (58.2%), reaching almost 91% in Estonia.  
93 In the Netherlands and Sweden, the Euro-American and Beijing lineages were equally  
94 represented. Denmark was the only country where the Delhi-CAS lineage constituted more  
95 than 60% of the MDR-TB strains (overrepresentation due to a national MDR-TB cluster),  
96 while in the United Kingdom, the Euro-American, Beijing and Delhi-CAS lineages were  
97 equally represented.

#### 98 **Supplementary Note S5**

99 Drug resistance profile of MTBC isolates collected in the study. The WGS-based analysis  
100 revealed mutations predicting resistance to rifampicin (R) in 2,151 (97.0%; 95%CI 96.2%;  
101 97.7%) isolates including 1,962 isolates (91.2%; 95%CI 89.9%; 92.3%) with additional  
102 resistance to isoniazid (H) (i.e. MDR-TB cases). Pyrazinamide (Z) resistance was predicted in  
103 1,286 isolates, including 1,280 (59.5%; 95%CI 57.4%; 61.6%) rifampicin resistant and six  
104 (9.1%; 95%CI 4.2%; 18.5%) rifampicin susceptible-isoniazid resistant isolates. Mutations  
105 predicting resistance to fluoroquinolones (FQs) were detected in 578 (26.8%; 95%CI 25.0%;  
106 28.7%) of the rifampicin resistant isolates and three rifampicin susceptible-isoniazid  
107 resistant isolates. A total of 696 (31.4%; 95%CI 30.4; 34.4%) isolates were predicted  
108 resistant to any of the second line injectable drugs among the rifampicin resistant isolates  
109 including 315 (14.7%; 95%CI 13.2%; 16.2%) RR/MDR-MTBC isolates carried mutations  
110 predicting resistance to amikacin, 677 (31.8%; 95%CI 29.6%; 33.2%) to kanamycin, and 338  
111 (15.7%; 95%CI 14.2%; 17.3%) to capreomycin. A total of 26 (1.2%; 95%CI 0.8%;1.8%)  
112 RR/MDR-MTBC isolates carried mutations (point mutations, frameshifts and large deletions)  
113 predicting resistance to bedaquiline [9] or were shown to be phenotypically resistant to this  
114 drug.

#### 115 **Supplementary Note References**

116 1. Kohl TA. Harmsen D. Rothgänger J. Walker T. Diel R. Niemann S. Harmonized Genome Wide  
117 Typing of Tubercle Bacilli Using a Web-Based Gene-By-Gene Nomenclature System. *EBioMedicine*  
118 2018; 34: 131-138.

119 2. Kohl TA. Utpatel C. Schleusener V. De Filippo MR. Beckert P. Cirillo DM. Niemann S. MTBseq:  
120 a comprehensive pipeline for whole genome sequence analysis of. *PeerJ* 2018; 6: e5895.

121 3. Li H. Durbin R. Fast and accurate short read alignment with Burrows-Wheeler transform.  
122 *Bioinformatics* 2009; 25(14): 1754-1760.

123 4. McKenna A. Hanna M. Banks E. Sivachenko A. Cibulskis K. Kernytsky A. Garimella K. Altshuler  
124 D. Gabriel S. Daly M. DePristo MA. The Genome Analysis Toolkit: a MapReduce framework for  
125 analyzing next-generation DNA sequencing data. *Genome Res* 2010; 20(9): 1297-1303.

126 5. Li H. Handsaker B. Wysoker A. Fennell T. Ruan J. Homer N. Marth G. Abecasis G. Durbin R.  
127 Subgroup GPDP. The Sequence Alignment/Map format and SAMtools. *Bioinformatics* 2009; 25(16):  
128 2078-2079.

129 6. Merker M. Kohl TA. Barilar I. Andres S. Fowler PW. Chryssanthou E. Ängeby K. Jureen P.  
130 Moradigaravand D. Parkhill J. Peacock SJ. Schön T. Maurer FP. Walker T. Köser C. Niemann S.  
131 Phylogenetically informative mutations in genes implicated in antibiotic resistance in  
132 *Mycobacterium tuberculosis* complex. *Genome Med* 2020; 12(1): 27.

133 7. Miotto P, Tessema B, Tagliani E, Chindelevitch L, Starks AM, Emerson C, Hanna D, Kim PS,  
134 Liwski R, Zignol M, Gilpin C, Niemann S, Denkinger CM, Fleming J, Warren RM, Crook D, Posey J,  
135 Gagneux S, Hoffner S, Rodrigues C, Comas I, Engelthaler DM, Murray M, Alland D, Rigouts L, Lange C,  
136 Dheda K, Hasan R, Ranganathan UDK, McNerney R, Ezewudo M, Cirillo DM, Schito M, Köser CU,  
137 Rodwell TC. A standardised method for interpreting the association between mutations and  
138 phenotypic drug resistance in. *Eur Respir J* 2017; 50(6).

139 8. CRyPTIC consortium, on behalf of 100,000 Genomes Project. Prediction of Susceptibility to  
140 First-Line Tuberculosis Drugs by DNA Sequencing. *N Engl J Med* 2018; 379(15): 1403-1415.

141 9. Kadura S, King N, Nakhoul M, Zhu H, Theron G, Köser CU, Farhat M. Systematic review of  
142 mutations associated with resistance to the new and repurposed *Mycobacterium tuberculosis* drugs  
143 bedaquiline, clofazimine, linezolid, delamanid and pretomanid. *J Antimicrob Chemother.* 2020 May 3.  
144 pii: dkaa136. doi: 10.1093/jac/dkaa136.  
145

146 **Supplementary Tables and Figures**

147 **Supplementary Table S1.** Summary of the pre-analytical, analytical and post-analytical  
 148 parameters and methods agreed upon during the technical expert consultation.

| Pre-analytical                                            |                                                                                                                                                                                                                                                                                                                                                      |
|-----------------------------------------------------------|------------------------------------------------------------------------------------------------------------------------------------------------------------------------------------------------------------------------------------------------------------------------------------------------------------------------------------------------------|
| <b>Inclusion criteria</b>                                 | <i>M. tuberculosis</i> complex (MTBC) isolates with confirmed resistance to rifampicin based on either genotypic- or phenotypic-based drug susceptibility testing. Subsequent isolates from the same TB patient can be included in the study as long as the isolation date is more than six months after the isolation date of the previous isolate. |
| <b>Material collected</b>                                 | Well-grown MTBC isolates on either solid or liquid media.                                                                                                                                                                                                                                                                                            |
| <b>MTBC inactivation method</b>                           | Heat-inactivation at 95°C for 30 minutes in thermal block or water bath.                                                                                                                                                                                                                                                                             |
| <b>Genomic DNA extraction method</b>                      | Any method suitable for extraction of high-quality genomic DNA, including any commercially available (para)magnetic or column-based system, or chemical method (e.g. N-cetyl-N,N,N-trimethyl ammonium bromide[CTAB] /NaCl protocol).                                                                                                                 |
| <b>Genomic DNA inclusion criteria</b>                     | Genomic DNA must be quantifiable by fluorometric-based method (e.g. using Qubit® Fluorometer) and must have a purity, measured by UV absorbance method, falling within the range of absorbance: OD <sub>260/280</sub> : 1.8 - 2.0 and OD <sub>260/230</sub> : 2.0-2.2.                                                                               |
| <b>Timeline for sample collection</b>                     | Samples should be sent to the EUSeqMyTB consortium in batches every two to three months for the entire duration of the project.                                                                                                                                                                                                                      |
| Analytical                                                |                                                                                                                                                                                                                                                                                                                                                      |
| <b>Sequencing platforms</b>                               | Any sequencing platform. This study is technology-agnostic.                                                                                                                                                                                                                                                                                          |
| <b>FASTQ files inclusion criteria</b>                     | Any set of paired FASTQ files with an unzipped file size > 350 MB. More than 95% of the reference genome (i.e. H37Rv, NC_000962.3) should be covered by sequence read.                                                                                                                                                                               |
| <b>Analysis pipeline</b>                                  | The relatedness analysis is performed using two sequential approaches: i) core genome multilocus sequence typing (cgMLST); ii) single nucleotide polymorphism (SNP)-based calculation of distances. All WGS data are analysed using the same analytical pipeline to ensure data comparability.                                                       |
| <b>Genomic regions excluded from relatedness analysis</b> | Regions of the genome that are known to assemble poorly (i.e. repetitive elements) and resistance-associated genes are excluded from the relatedness analysis.                                                                                                                                                                                       |
| Post-analytical                                           |                                                                                                                                                                                                                                                                                                                                                      |
| <b>Cluster definition</b>                                 | A threshold of maximum 5 SNPs/alleles is used to indicate high-confidence transmission, while a SNP/allele difference between 6 and 12 SNPs indicates a more putative (less recent) transmission. Beyond 12 SNPs/alleles, transmission is considered unlikely.                                                                                       |
| <b>Drug resistance prediction</b>                         | The list of drug resistance associated SNPs provided by the Relational Sequencing TB Data Platform (ReSeq-TB) is used as reference.                                                                                                                                                                                                                  |
| 149                                                       | MB: megabyte; MTBC: <i>M. tuberculosis</i> complex; SNP: single nucleotide polymorphism; UV: Ultraviolet;                                                                                                                                                                                                                                            |
| 150                                                       | WGS: whole genome sequencing.                                                                                                                                                                                                                                                                                                                        |

151 **Supplementary Table S2.** *Mycobacterium tuberculosis* isolates submitted in 2018 stratified  
 152 by drug resistance profile as determined by WGS analysis (n=948)

| Country        | Number of isolates submitted in 2018 |           |            | MDR-TB cases ECDC data 2018 | Coverage by country |
|----------------|--------------------------------------|-----------|------------|-----------------------------|---------------------|
|                | RS-TB                                | RR-TB     | MDR-TB     |                             |                     |
| Austria        | 0                                    | 0         | 19         | 18                          | 105.6               |
| Belgium        | 0                                    | 1         | 7          | 7                           | 100                 |
| Bulgaria       | 0                                    | 3         | 21         | 24                          | 87.5                |
| Croatia        | 0                                    | 0         | 2          | 2                           | 100                 |
| Cyprus         | 0                                    | 0         | 0          | 0                           | n.a.                |
| Czech Republic | 0                                    | 0         | 9          | 12                          | 75.0                |
| Denmark        | 0                                    | 0         | 4          | 4                           | 100                 |
| Estonia        | 0                                    | 2         | 23         | 30                          | 76.7                |
| Finland        | 0                                    | 0         | 4          | 4                           | 100                 |
| France         | 1                                    | 3         | 62         | 82                          | 75.6                |
| Germany        | 1                                    | 5         | 118        | 116                         | 101.7               |
| Hungary        | 1                                    | 0         | 12         | 12                          | 100                 |
| Ireland        | 0                                    | 3         | 4          | 5                           | 80.0                |
| Italy          | 1                                    | 8         | 35         | 53 <sup>a</sup>             | 66.0                |
| Latvia         | 0                                    | 0         | 33         | 46 <sup>b</sup>             | 71.7                |
| Lithuania      | 3                                    | 3         | 54         | 170                         | 31.8                |
| Luxemburg      | 0                                    | 0         | 0          | 1                           | 0                   |
| Malta          | 0                                    | 0         | 0          | 0                           | n.a.                |
| Netherlands    | 0                                    | 0         | 6          | 6                           | 100                 |
| Norway         | 0                                    | 2         | 4          | 4                           | 100                 |
| Poland         | 0                                    | 6         | 51         | 48                          | 106.3               |
| Portugal       | 0                                    | 1         | 18         | 10                          | 180                 |
| Romania        | 20                                   | 39        | 276        | 354                         | 78.0                |
| Slovakia       | 0                                    | 0         | 4          | 2                           | 200                 |
| Slovenia       | 0                                    | 0         | 0          | 0                           | n.a.                |
| Spain          | 0                                    | 4         | 34         | 33                          | 103                 |
| Sweden         | 0                                    | 0         | 11         | 13                          | 84.6                |
| United Kingdom | 0                                    | 3         | 27         | 37                          | 73.0                |
| <b>Total</b>   | <b>27</b>                            | <b>83</b> | <b>838</b> | <b>1093</b>                 | <b>76.7</b>         |

153 RS-TB: rifampicin susceptible TB; RR-TB: rifampicin resistant TB; MDR-TB: multidrug resistant TB;  
 154 n.a.: not applicable.

155 <sup>a</sup> Italian NIH notification 2020 – 2018 data

156 <sup>b</sup> ECDC notification 2019 – 2017 data

157

158

159 **Supplementary Table S3.** List of genomic regions considered for drug resistance analysis.

| <b>Drug</b>      | <b>Genomic Region</b> | <b>Gene</b> |
|------------------|-----------------------|-------------|
| Rifampicin       | Rv0667                | <i>rpoB</i> |
| Isoniazid        | Rv1483                | <i>inhA</i> |
|                  | Rv1908c               | <i>katG</i> |
| Ethambutol       | Rv3795                | <i>embB</i> |
| Pyrazinamide     | Rv2043c               | <i>pncA</i> |
| Fluoroquinolones | Rv0006                | <i>gyrA</i> |
|                  | Rv0005                | <i>gyrB</i> |
| Amikacin         | Rvnr01                | <i>Rrs</i>  |
| Kanamycin        | Rvnr01                | <i>Rrs</i>  |
|                  | Rv2416c               | <i>eis</i>  |
| Capreomycin      | Rvnr01                | <i>Rrs</i>  |
|                  | Rv1694                | <i>tlyA</i> |
| Bedaquiline      | Rv0678                | <i>mmpR</i> |
|                  | Rv1305                | <i>atpE</i> |

160  
161  
162  
163  
164  
165  
166  
167  
168  
169  
170  
171  
172  
173  
174  
175



176 **Supplementary Table S4.** Cross-border clusters identified using a cgMLST-based approach.

| cgMLST cross-border clusters involving recent transmission events |               |                         | 177 |
|-------------------------------------------------------------------|---------------|-------------------------|-----|
| Cross-border cluster name                                         | Isolates (N.) | Countries involved (N.) | 178 |
| cgCL 1                                                            | 36            | 4                       | 179 |
| cgCL 2                                                            | 34            | 4                       | 180 |
| cgCL 3                                                            | 32            | 3                       |     |
| cgCL 4                                                            | 29            | 8                       | 181 |
| cgCL 5                                                            | 20            | 2                       | 182 |
| cgCL 7                                                            | 17            | 3                       | 183 |
| cgCL 8                                                            | 16            | 3                       | 184 |
| cgCL 9                                                            | 14            | 2                       | 185 |
| cgCL 10                                                           | 13            | 2                       | 186 |
| cgCL 12                                                           | 12            | 4                       | 187 |
| cgCL 13                                                           | 12            | 2                       | 188 |
| cgCL 14                                                           | 11            | 3                       | 189 |
| cgCL 15                                                           | 11            | 3                       | 190 |
| cgCL 16                                                           | 11            | 5                       | 191 |
| cgCL 17                                                           | 10            | 4                       | 192 |
| cgCL 18                                                           | 10            | 4                       | 193 |
| cgCL 19                                                           | 10            | 2                       | 194 |
| cgCL 20                                                           | 9             | 3                       | 195 |
| cgCL 21                                                           | 9             | 4                       | 196 |
| cgCL 27                                                           | 7             | 2                       | 197 |
| cgCL 28                                                           | 6             | 2                       | 198 |
| cgCL 31                                                           | 6             | 3                       | 199 |
| cgCL 33                                                           | 6             | 2                       | 200 |
| cgCL 40                                                           | 5             | 2                       | 201 |
| cgCL 48                                                           | 5             | 2                       | 202 |
| cgCL 55                                                           | 4             | 3                       | 203 |
| cgCL 57                                                           | 5             | 2                       | 204 |
| cgCL 64                                                           | 5             | 2                       | 205 |
| cgCL 68                                                           | 4             | 2                       | 206 |
| cgCL 72 -135 <sup>a</sup>                                         | 3             | 2                       | 207 |
| cgCL 136 -307 <sup>b</sup>                                        | 2             | 2                       | 208 |
|                                                                   |               |                         | 209 |
|                                                                   |               |                         | 210 |
|                                                                   |               |                         | 211 |

212 cgCL: cgMLST-based cluster; N: numbers.

213 <sup>a</sup> Twelve (12) clusters comprising three isolates from two countries;

214 <sup>b</sup> Twenty-two (22) clusters comprising two isolates from two countries.

215 To each cluster identified by cgMLST, either national or cross-border, a sequential number from 1 to  
 216 307 was assigned based on the size of the cluster starting from the largest one. Only cross-border  
 217 clusters are reported in the table

218

219 **Supplementary Table S5.** Major cross-border clusters identified in the study.

| Cluster name  | Number of isolates in cluster | Lineage classification | WGS-based drug resistance profile (gene; mutation; number of isolates with mutation)                                                                                                                                                                                                   | Country of isolation (number of isolates by country)              | Country of birth of RR/MDR-TB cases (number of TB cases)                        | Site of disease (number of RR/MDR-TB cases) |
|---------------|-------------------------------|------------------------|----------------------------------------------------------------------------------------------------------------------------------------------------------------------------------------------------------------------------------------------------------------------------------------|-------------------------------------------------------------------|---------------------------------------------------------------------------------|---------------------------------------------|
| <b>snpCL1</b> | 30                            | 4.8                    | R-R ( <i>rpoB</i> ; S450L; n=30);<br>H-R ( <i>katG</i> ; S315T; n=30; <i>inhA</i> prom; c-15t; n=30);<br>E-R ( <i>embB</i> ; M306I; n=30);<br>Z-R ( <i>pncA</i> ; A146V; n=30);<br>FQ-R ( <i>gyrA</i> ; D94Y; n=11; <i>gyrB</i> ; A504V; n=3);<br>BDQ-R (Rv0678; large deletion; 5/30) | Romania (n=16)<br>Italy (n=12)<br>United Kingdom (n=2)            | Romania (n=22)<br>Italy (n=5)<br>Albania (n=1)<br>Brazil (n=1)<br>Ukraine (n=1) | pulmonary (n=28)<br>unknown (n=2)           |
| <b>snpCL3</b> | 16                            | 4.6.2                  | R-R ( <i>rpoB</i> ; S450L; n=16);<br>H-R ( <i>katG</i> ; S315T; n=16);<br>E-R ( <i>embB</i> ; M306I; n=16);<br>Z-R ( <i>pncA</i> ; W68C; n=16);<br>CAP-R ( <i>tlyA</i> ; N236K; n=16);                                                                                                 | Germany (n=9)<br>Austria (n=4)<br>Italy (n=2)<br>France (n=1)     | Somalia (n=3)<br>Sudan (n=1)<br>unknown (n=12)                                  | pulmonary (n=3)<br>unknown (n=13)           |
| <b>snpCL8</b> | 12                            | 4.2.2                  | R-R ( <i>rpoB</i> ; S450L; n=12);<br>H-R ( <i>katG</i> ; S315T; n=12);<br>E-R ( <i>embB</i> ; G406A; n=12);<br>Z-R ( <i>pncA</i> ; T76P; n=12);                                                                                                                                        | Germany (n=5)<br>Italy (n=5)<br>Netherlands (n=1)<br>Sweden (n=1) | Somalia (n=7)<br>unknown (n=5)                                                  | pulmonary (n=3)<br>unknown (n=9)            |

220 R: rifampicin; H: isoniazid; E: ethambutol; Z: pyrazinamide; FQ: fluoroquinolones; BDQ: bedaquiline; CAP: capreomycin; R: resistance; n: numbers.

221 All **isolates** were isolated between 2017 and 2019.

222 **Supplementary Figure S1.** Lineage classification of the 316 clustered RR/MDR  
 223 *Mycobacterium tuberculosis* isolates

226

227

228

229

230

231

232

233

**a**

| Lineage  | Number of strains | Percentage |
|----------|-------------------|------------|
| 2.2.1    | 72                | 22.8       |
| 3        | 2                 | 0.6        |
| 4.1.1.1  | 3                 | 0.9        |
| 4.1.2    | 2                 | 0.6        |
| 4.1.2.1  | 29                | 9.2        |
| 4.2.1    | 37                | 11.7       |
| 4.2.2    | 27                | 8.5        |
| 4.2.2.1  | 5                 | 1.6        |
| 4.3      | 30                | 9.5        |
| 4.6.2    | 16                | 5.1        |
| 4.7; 4.8 | 91                | 28.8       |
| 4.9      | 2                 | 0.6        |

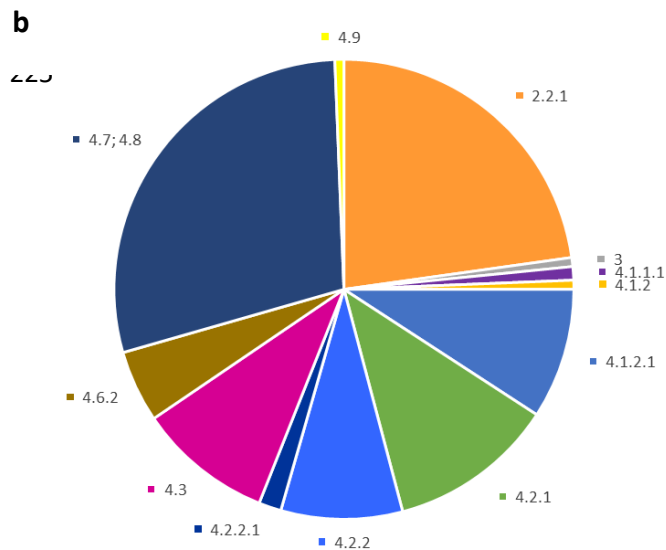

234 Table (a) and chart pie (b) showing the lineage distribution of the 316 RR/MDR-MTBC isolates in  
 235 cross-border clusters. Lineages: 2.2.1: Beijing; 3 Delhi-CAS; 4.1.1.1: X-type; 4.1.2: Euro-American;  
 236 4.1.2.1: Haarlem; 4.2.1: Ural; 4.2.2: Euro-American; 4.2.2.1: TUR; 4.3: LAM; 4.6.2: Euro-American;  
 237 4.7: manly T; 4.8: mainly T; 4.9: H37Rv-like.

252 **Supplementary Figure S2**

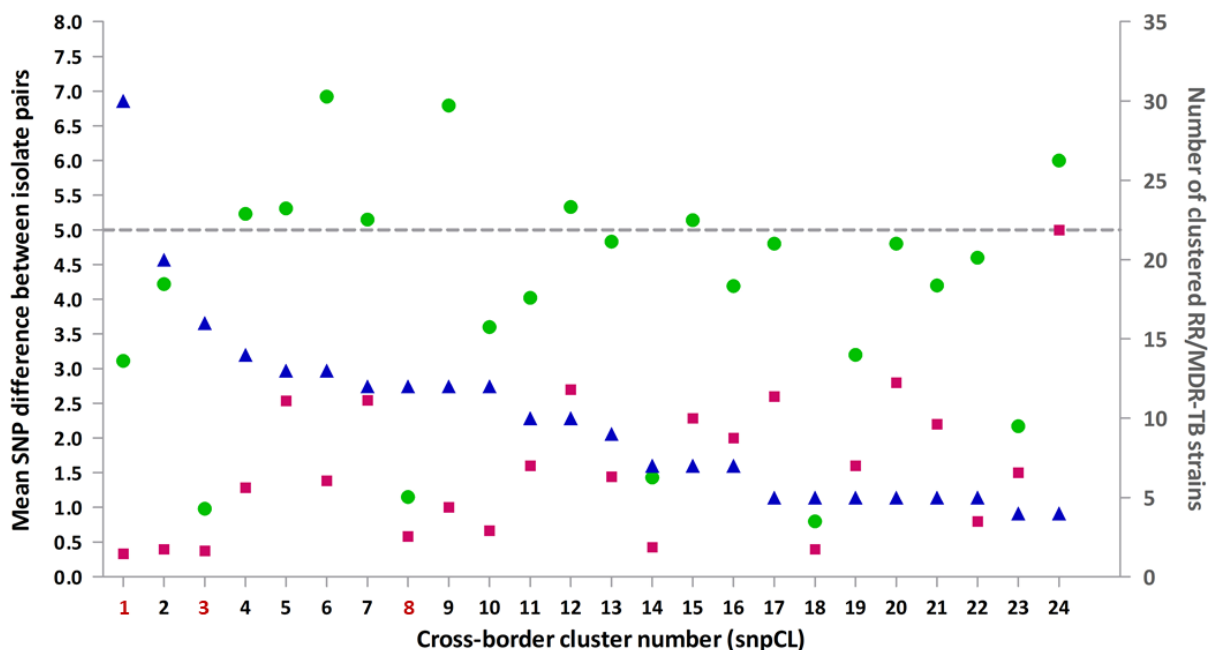

253  
 254 Blue triangles (▲) represent the number of RR/MDR-MTBC isolates included in each SNP-based  
 255 cross-border cluster, green dots (●) represent the mean SNP difference between each isolate pair of  
 256 cluster (i.e. "cluster distribution"), red squares (■) represent the mean SNP difference between each  
 257 isolate and its next closest isolate; Y left axis reports the mean SNP difference between isolate pairs;  
 258 Y right axis reports the number of clustered isolates; X axis reports the identified SNP-based cross-  
 259 border clusters (only those including at least four MTBC isolates are shown). The dashed line at 5  
 260 SNPs indicates the threshold selected to identify cross-border clusters with increased likelihood of  
 261 recent transmission. Cross-border clusters number in red (snpCL1, snpCL3 and snpCL8) are described  
 262 in the result section and Table 6.

263
